# Supplementary figures and images for: Cyanidin-3-O-glucoside reduces nanopolystyrene-induced toxicity and accumulation: roles of mitochondrial energy metabolism and cellular efflux
Source: Royal Society of Chemistry journal article supplement (doi:10.1039/d2en00254j), 2022-01-01

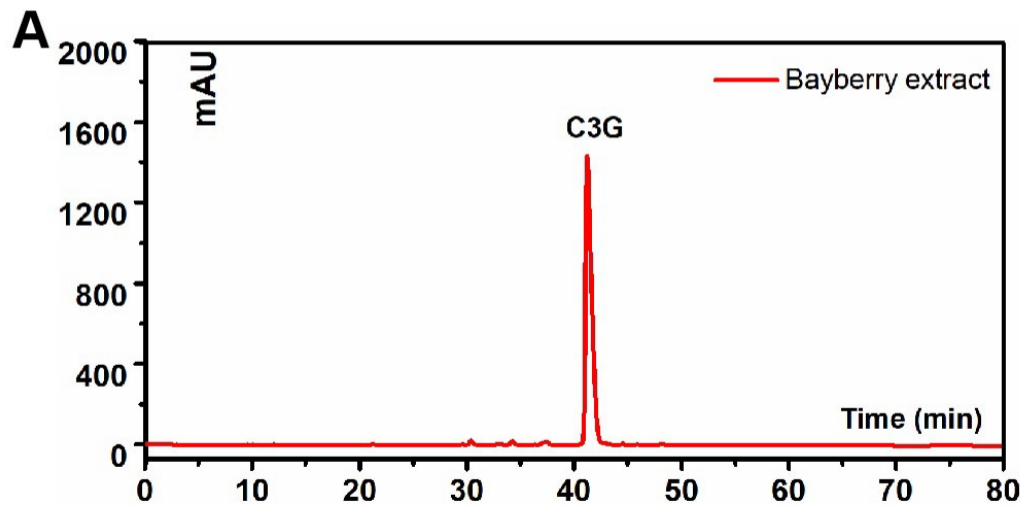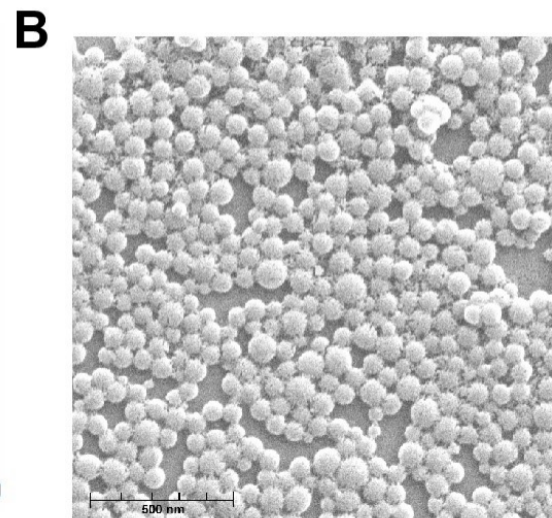

Supplement: d2en00254j2.pdf [file d2en00254j2.pdf]

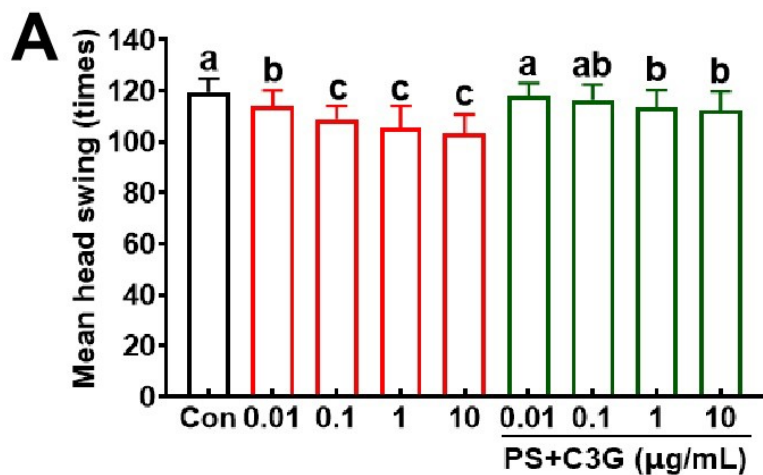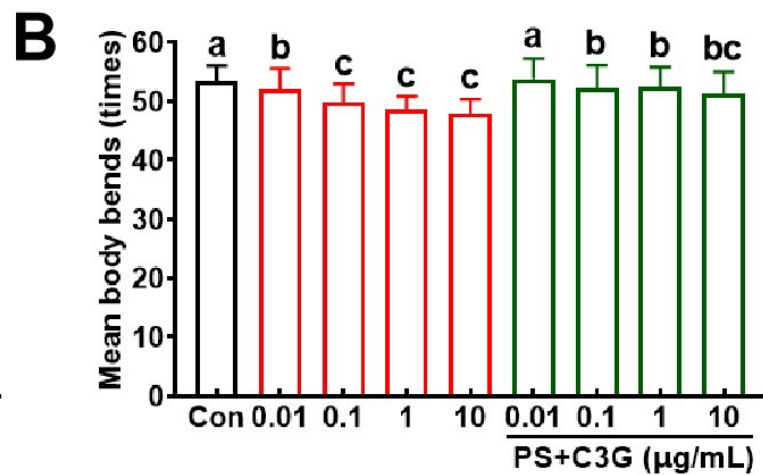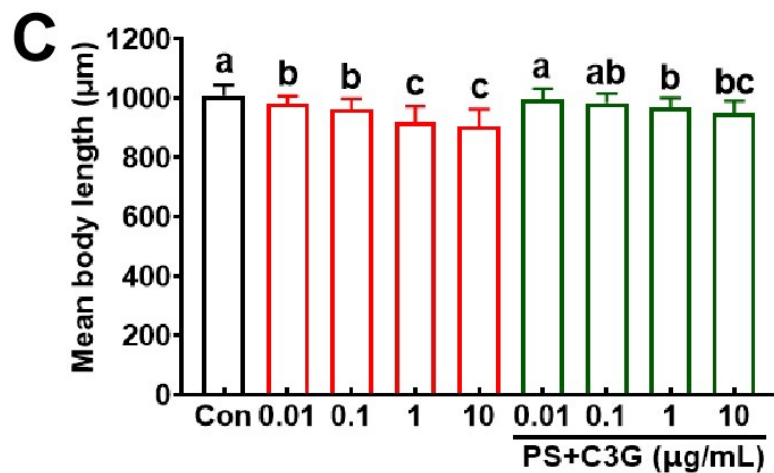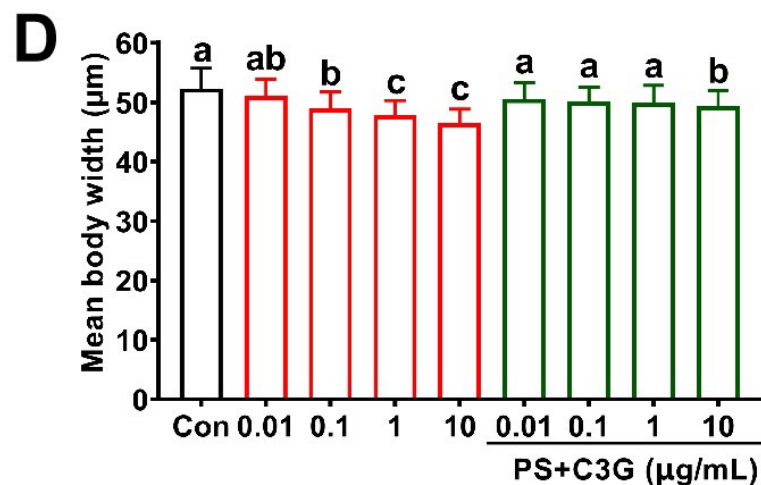

Supplement: d2en00254j3.pdf [file d2en00254j3.pdf]

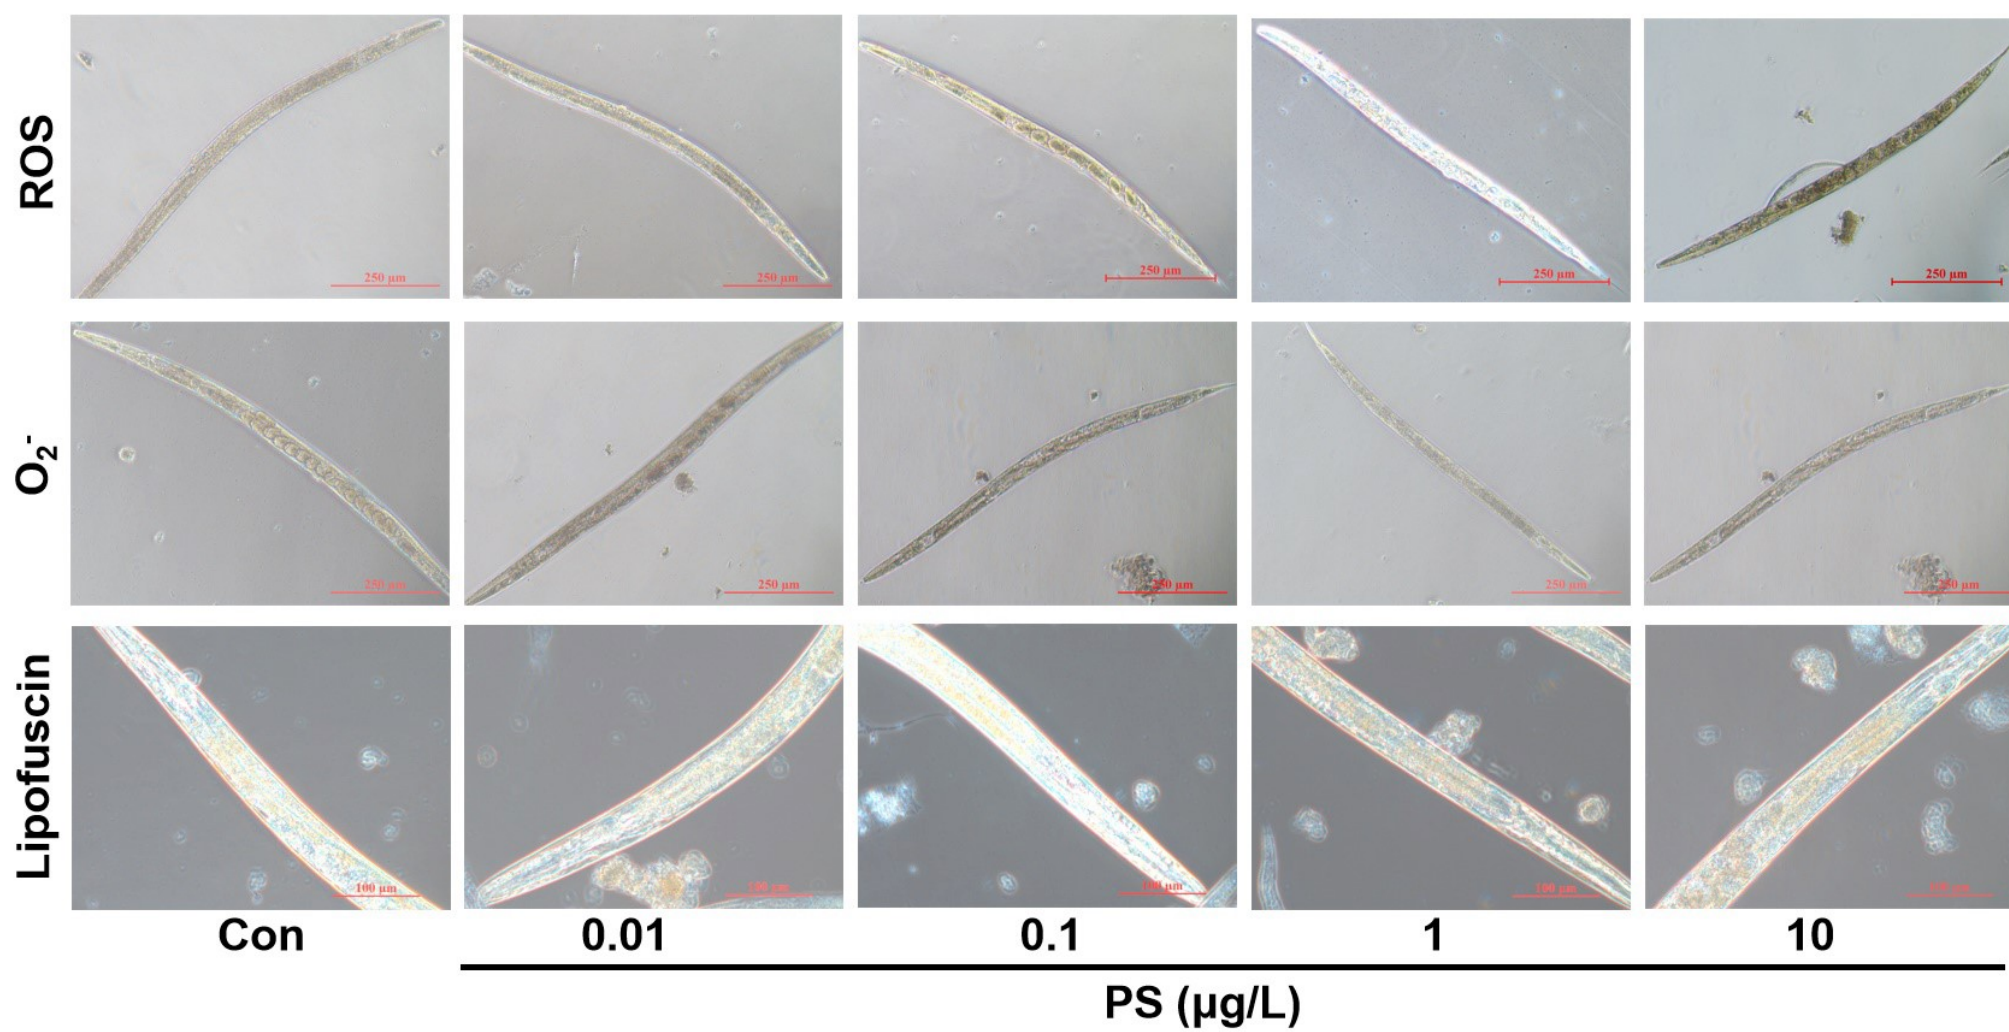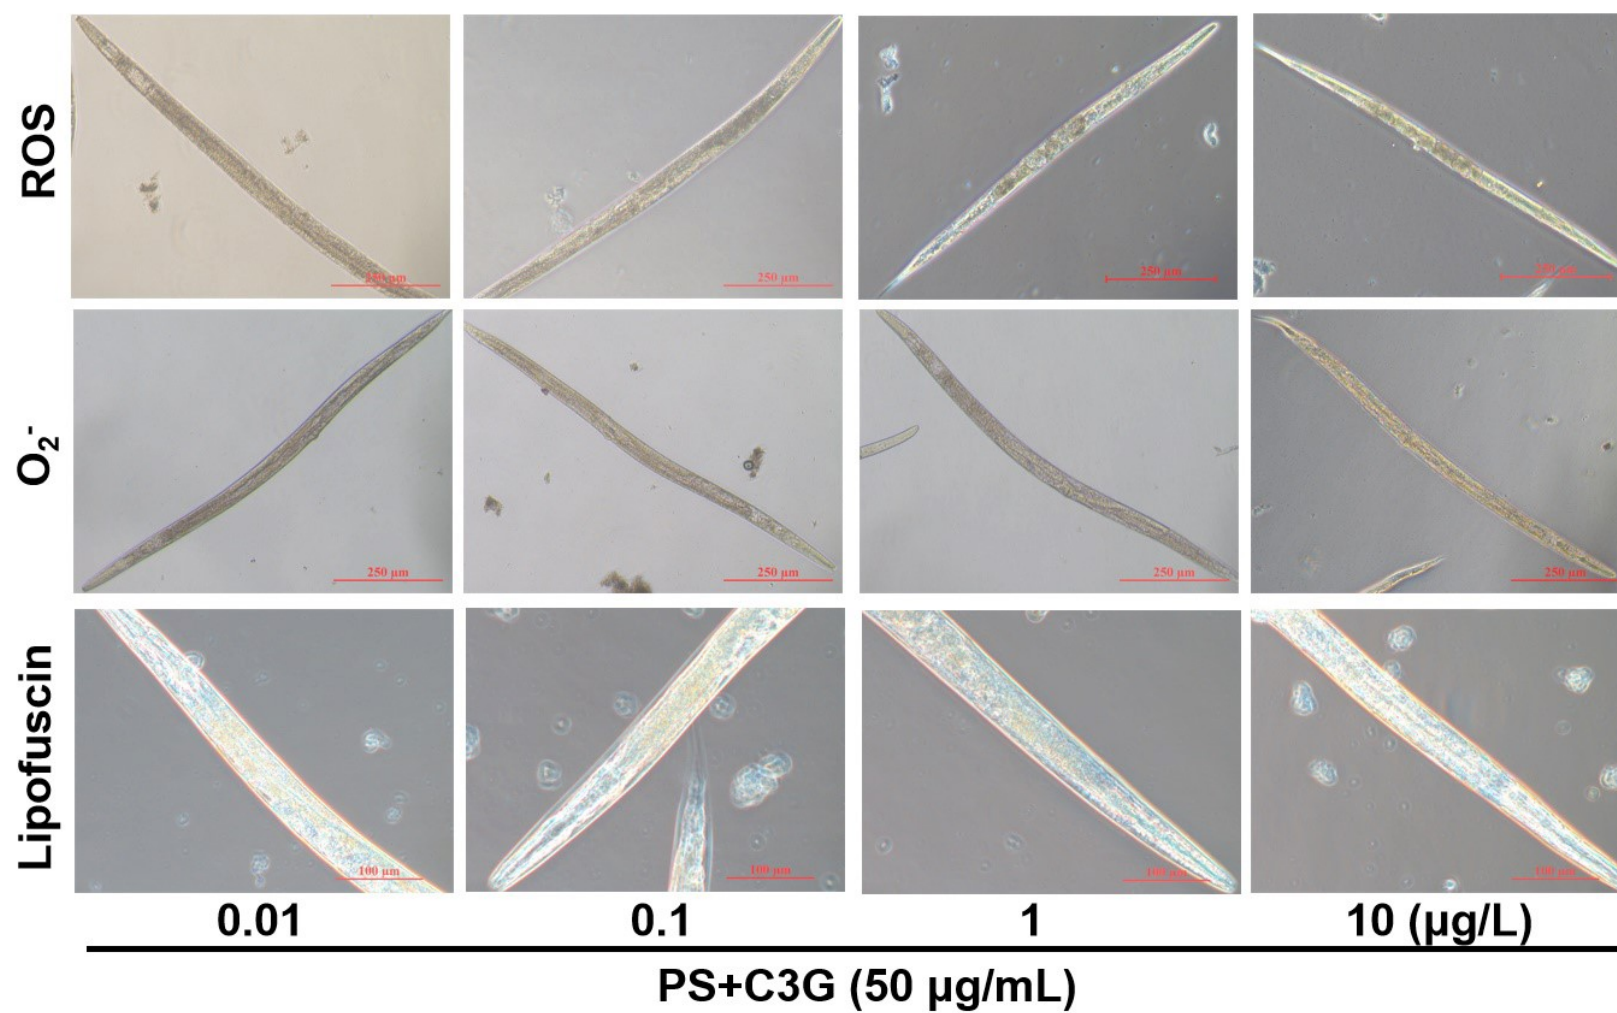

Supplement: d2en00254j4.pdf [file d2en00254j4.pdf]

**A**

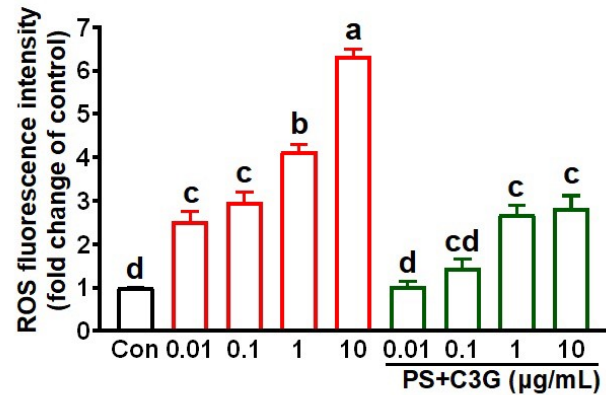

**B**

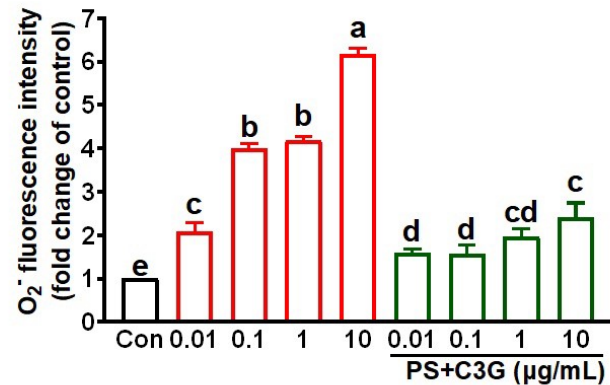

**C**

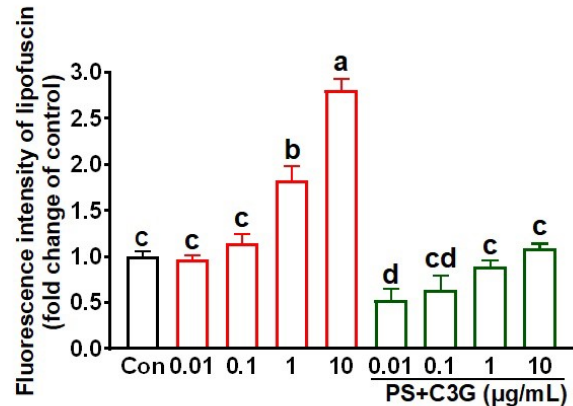

Supplement: d2en00254j5.pdf [file d2en00254j5.pdf]

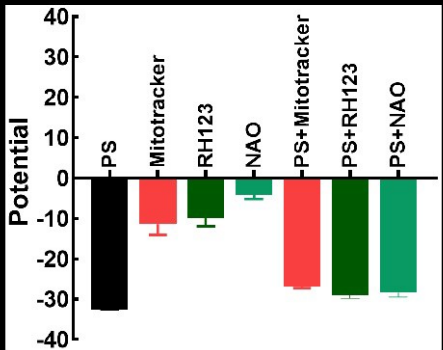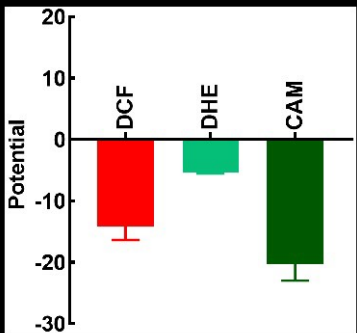

Supplement: d2en00254j6.pdf [file d2en00254j6.pdf]

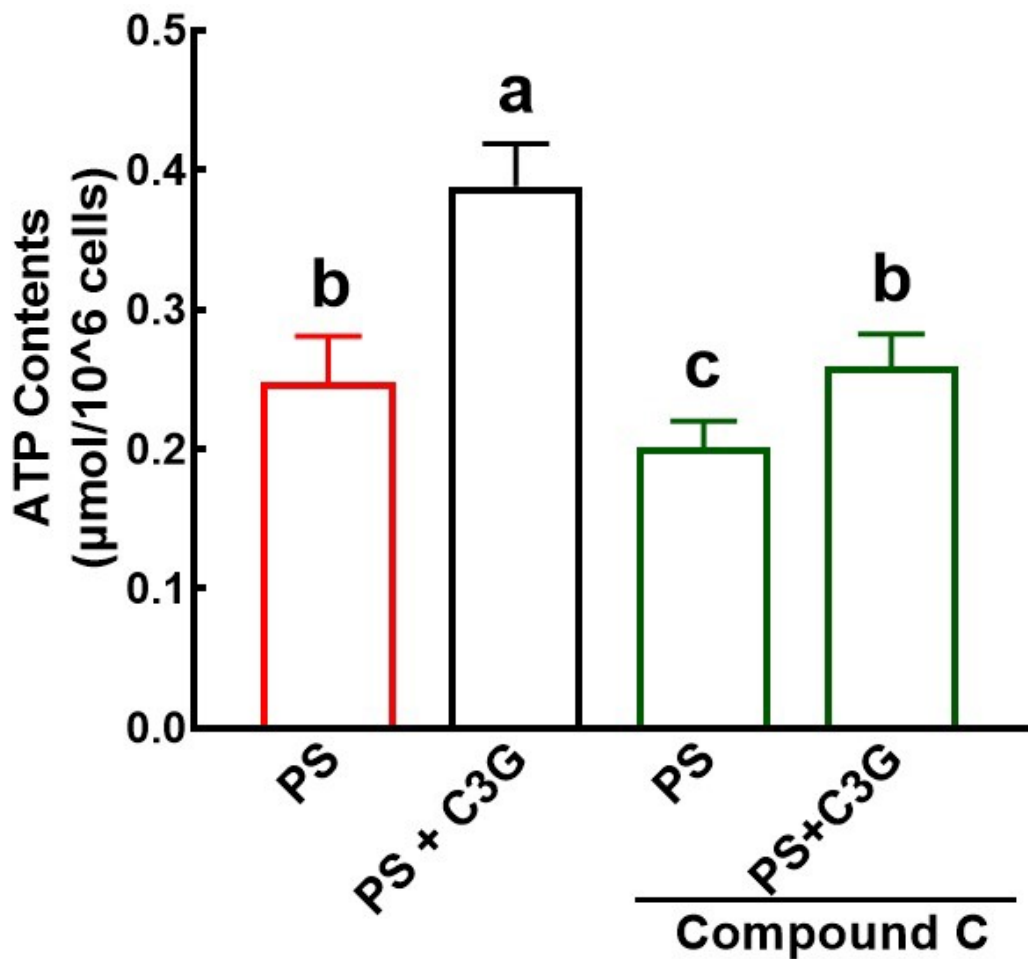

Supplement: d2en00254j7.pdf [file d2en00254j7.pdf]

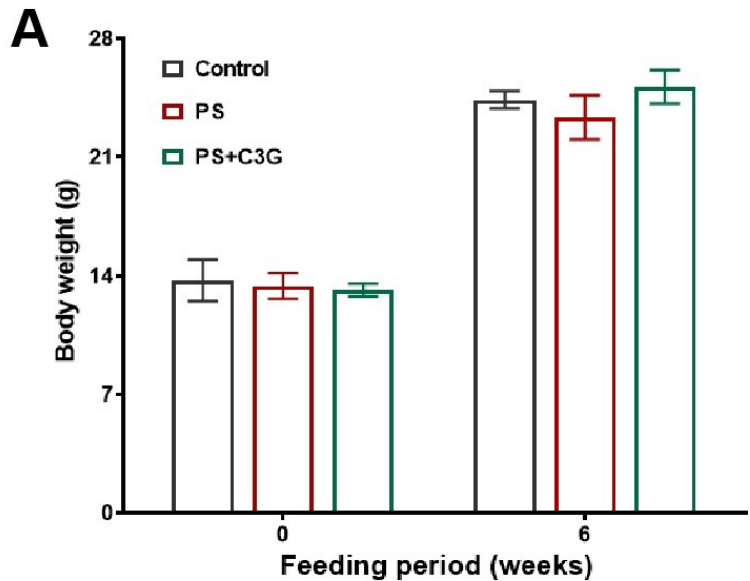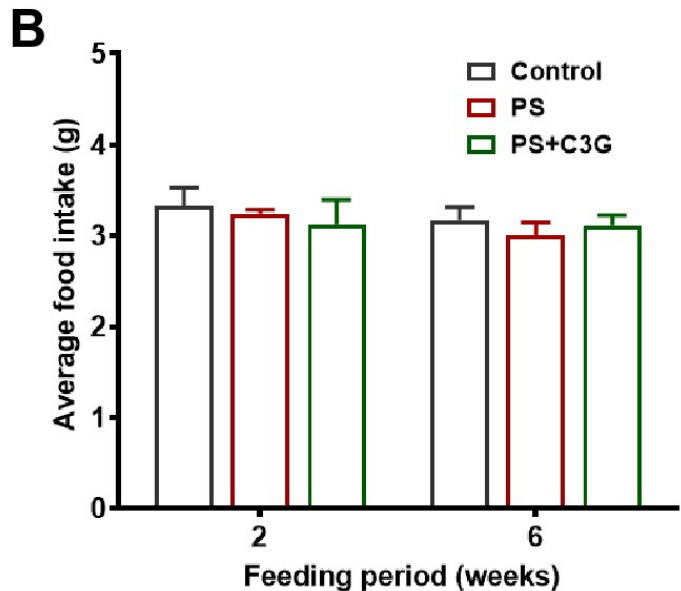

Supplement: d2en00254j8.pdf [file d2en00254j8.pdf]
